# Supplementary material for: Simultaneous Quantification of Nine Target Compounds in Traditional Korean Medicine, Bopyeo-Tang, Using High-Performance Liquid Chromatography–Photodiode Array Detector and Ultra-Performance Liquid Chromatography–Tandem Mass Spectrometry
Source: MDPI journal article supplement (doi:10.3390/molecules29051171), 2024-03-06
Supplement: s1 [file s1]

**Table S1**

Analytical conditions for simultaneous analysis of the nine target components in a BPT sample by HPLC–PDA.

| Chromatographic parameter |                                                                       |       |       |
|---------------------------|-----------------------------------------------------------------------|-------|-------|
| Column                    | SunFire™ C <sub>18</sub> reverse phase column (250 mm × 4.6 mm, 5 μm) |       |       |
| Detector                  | PDA (250, 280, 325, 365, and 370 nm)                                  |       |       |
| Flow rate                 | 1.0 mL/min                                                            |       |       |
| Injection volume          | 10.0 μL                                                               |       |       |
| Column temperature        | 30.0 °C                                                               |       |       |
| Mobile phase              | A: 0.1% (v/v) aqueous formic acid                                     |       |       |
|                           | B: 0.1% (v/v) formic acid in acetonitrile                             |       |       |
| Gradient elution          | Time (min)                                                            | A (%) | B (%) |
|                           | 0                                                                     | 95    | 5     |
|                           | 40                                                                    | 40    | 60    |
|                           | 50                                                                    | 5     | 95    |
|                           | 55                                                                    | 5     | 95    |
|                           | 60                                                                    | 95    | 5     |
|                           | 70                                                                    | 95    | 5     |

PDA; photo-diode array

**Table S2**

System suitability for simultaneous analysis of the nine target components by HPLC–PDA.

| Analyte | $k'$  | $\alpha$ | $N$        | $R_s$ | $S$  |
|---------|-------|----------|------------|-------|------|
| 1       | 1.24  | 1.76     | 36031.97   | 13.02 | 1.14 |
| 2       | 2.18  | 1.32     | 111828.31  | 10.70 | 1.08 |
| 3       | 2.88  | 1.32     | 160174.59  | 10.70 | 1.20 |
| 4       | 4.65  | 1.28     | 428036.39  | 20.79 | 1.13 |
| 5       | 5.98  | 1.28     | 473439.73  | 20.79 | 1.19 |
| 6       | 8.19  | 1.18     | 742217.85  | 20.24 | 1.16 |
| 7       | 9.69  | 1.18     | 911649.05  | 20.24 | 1.13 |
| 8       | 12.85 | 1.09     | 1028117.50 | 12.13 | 1.04 |
| 9       | 13.98 | 1.09     | 1201612.01 | 12.13 | 1.05 |

The analytes were hydroxymethylfurfural (1), mulberroside A (2), chlorogenic acid (3), calycosin 7-*O*-glucoside (4), 3,5-dicaffeoylquinic acid (5), quercetin (6), kaempferol (7), schizandrin (8), and gomisins A (9).  $k'$ ; retention factor,  $\alpha$ ; separation factor,  $N$ ; theoretical plate number,  $R_s$ ; resolution, and  $S$ ; symmetry factor

**Table S3**

Repeatability of retention time and peak area of the nine targets by HPLC ( $n = 6$ ).

| Analyte <sup>1</sup> | Retention time (min) |                     |         | Peak area (mAU) |         |         |
|----------------------|----------------------|---------------------|---------|-----------------|---------|---------|
|                      | Mean                 | SD $\times 10^{-1}$ | RSD (%) | Mean            | SD      | RSD (%) |
| 1                    | 6.36                 | 0.06                | 0.10    | 860115.83       | 4940.92 | 0.57    |
| 2                    | 9.02                 | 0.07                | 0.07    | 663327.67       | 3546.44 | 0.53    |
| 3                    | 11.00                | 0.06                | 0.05    | 702371.17       | 3837.64 | 0.55    |
| 4                    | 16.03                | 0.02                | 0.01    | 500858.67       | 3162.93 | 0.63    |
| 5                    | 19.78                | 0.02                | 0.01    | 728009.17       | 4459.86 | 0.61    |
| 6                    | 26.06                | 0.03                | 0.01    | 719127.33       | 4588.76 | 0.64    |
| 7                    | 30.31                | 0.04                | 0.01    | 868995.83       | 5782.18 | 0.67    |
| 8                    | 39.29                | 0.03                | 0.01    | 1067350.67      | 6562.64 | 0.61    |
| 9                    | 42.48                | 0.03                | 0.01    | 978360.33       | 5843.46 | 0.60    |

<sup>1</sup> Hydroxymethylfurfural (1), mulberroside A (2), chlorogenic acid (3), calycosin 7-*O*-glucoside (4), 3,5-dicaffeoylquinic acid (5), quercetin (6), kaempferol (7), schizandrin (8), and gomisins A (9).

**Table S4**

Composition of and information on Bopyeo-tang.

| Herbal medicine            | Scientific name                             | Family         | Using part       | Amount (mg) | Ratio (%) |
|----------------------------|---------------------------------------------|----------------|------------------|-------------|-----------|
| Mori Radicis Cortex        | <i>Morus alba</i> L.                        | Moraceae       | Root bark        | 1500.00     | 30.00     |
| Rehmanniae Radix Preparata | <i>Rehmannia glutinosa</i> (Gaertn.) DC.    | Plantaginaceae | Root             | 1500.00     | 30.00     |
| Ginseng Radix              | <i>Panax ginseng</i> C.A.Mey.               | Araliaceae     | Root             | 500.00      | 10.00     |
| Asteris Radix et Rhizoma   | <i>Aster tataricus</i> L.f.                 | Compositae     | Root and rhizome | 500.00      | 10.00     |
| Astragali Radix            | <i>Astragalus propinquus</i> Schischkin     | Leguminosae    | Root             | 500.00      | 10.00     |
| Schisandrae Fructus        | <i>Schisandra chinensis</i> (Turcz.) Baill. | Schisandraceae | Fruit            | 500.00      | 10.00     |
|                            |                                             |                | Total            | 5000.0      | 100.00    |

**Table S5**

Information on the nine reference standard compounds.

| Analyte <sup>1</sup> | Purity (%) | Molecular formula                               | CAS No.     | PubChem CID | Catalog No. | Maker                       |
|----------------------|------------|-------------------------------------------------|-------------|-------------|-------------|-----------------------------|
| 1                    | ≥ 99.0     | C <sub>6</sub> H <sub>6</sub> O <sub>3</sub>    | 67-47-0     | 237332      | W501808     | Merck KGaA                  |
| 2                    | 98.1       | C <sub>26</sub> H <sub>32</sub> O <sub>14</sub> | 102841-42-9 | 6443484     | ES030-A     | EnsolBioSciences            |
| 3                    | 99.7       | C <sub>16</sub> H <sub>18</sub> O <sub>9</sub>  | 327-97-9    | 1794427     | PHL89175    | Merck KGaA                  |
| 4                    | 99.4       | C <sub>22</sub> H <sub>22</sub> O <sub>10</sub> | 20633-67-4  | 5318267     | DR10682     | Shanghai Sunny Biotech      |
| 5                    | 98.2       | C <sub>25</sub> H <sub>24</sub> O <sub>12</sub> | 2450-53-5   | 6474310     | DR11570     | Shanghai Sunny Biotech      |
| 6                    | 99.2       | C <sub>15</sub> H <sub>10</sub> O <sub>7</sub>  | 117-39-5    | 5280343     | CFN99272    | Wuhan ChemFaces Biochemical |
| 7                    | ≥ 98.0     | C <sub>15</sub> H <sub>10</sub> O <sub>6</sub>  | 520-18-3    | 5280863     | DR10770     | Shanghai Sunny Biotech      |
| 8                    | 99.3       | C <sub>24</sub> H <sub>32</sub> O <sub>7</sub>  | 7432-28-2   | 23915       | BP1265      | Biopurify Phytochemicals    |
| 9                    | 99.9       | C <sub>23</sub> H <sub>28</sub> O <sub>7</sub>  | 58546-54-6  | 634470      | DR100561    | Shanghai Sunny Biotech      |

<sup>1</sup> Hydroxymethylfurfural (1), mulberroside A (2), chlorogenic acid (3), calycosin 7-*O*-glucoside (4), 3,5-dicaffeoylquinic acid (5), quercetin (6), kaempferol (7), schizandrin (8), and gomisins A (9).

**Table S6**

UPLC–MS/MS MRM conditions for simultaneous analysis of nine target components in BPT.

| UPLC conditions  |                                                                   | MS conditions        |                                      |
|------------------|-------------------------------------------------------------------|----------------------|--------------------------------------|
| UPLC system      | Acquity UPLC H-Class PLUS                                         | MS system            | Xevo TQ-S micro                      |
| Column           | Acquity UPLC BEH C <sub>18</sub> column (2.1 mm × 100 mm, 1.7 μm) | MS software          | MassLynx v4.2                        |
| Column temp.     | 40 °C                                                             | Ion source           | ESI <sup>+</sup> or ESI <sup>-</sup> |
| Sample temp.     | 5 °C                                                              | Acquisition mode     | MRM                                  |
| Injection volume | 2.0 μL                                                            | Capillary voltage    | 3.3 kV                               |
| Flow rate        | 0.3 mL/min                                                        | Cone gas flow        | 80 L/h                               |
| Mobile phase A   | 0.1% (v/v) acetic acid in distilled water                         | Desolvation gas flow | 600 L/h                              |
| Mobile phase B   | 0.1% (v/v) acetic acid in distilled Acetonitrile                  | Desolvation temp.    | 300 °C                               |
| Gradient         | Time (min)                                                        | A (%)                | B (%)                                |
|                  | Initial                                                           | 95                   | 5                                    |
|                  | 14.43                                                             | 40                   | 60                                   |
|                  | 14.29                                                             | 5                    | 95                                   |
|                  | 15.71                                                             | 5                    | 95                                   |
|                  | 17.14                                                             | 95                   | 5                                    |
|                  | 20.00                                                             | 95                   | 5                                    |

ESI; electrospray ionization, MRM; multiple reaction monitoring

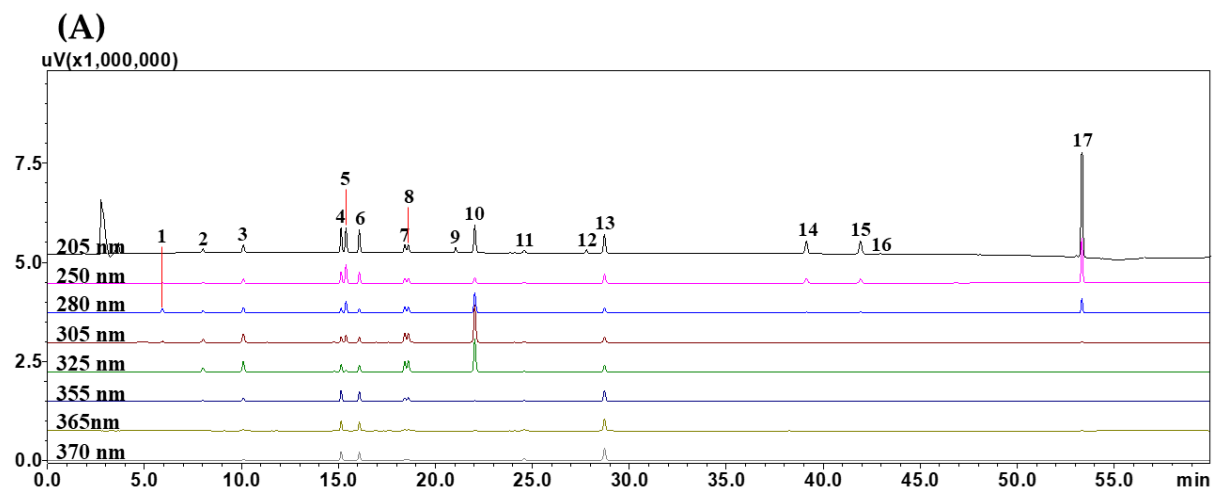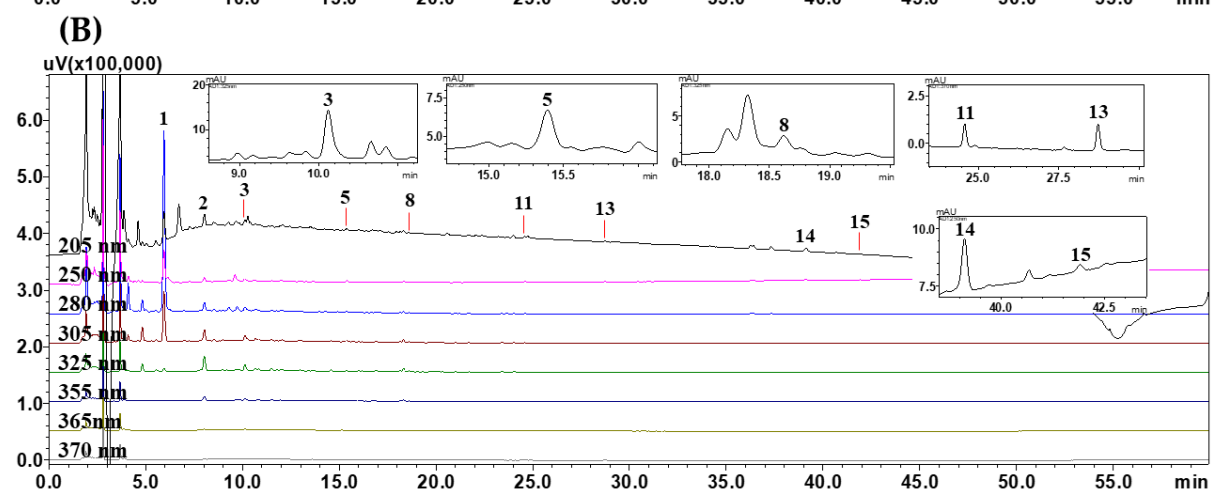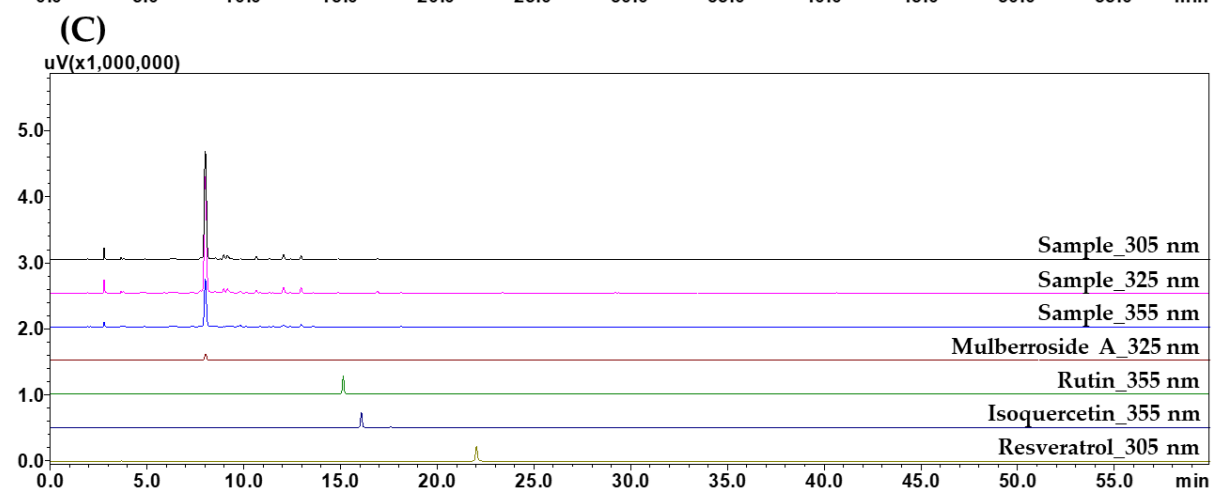

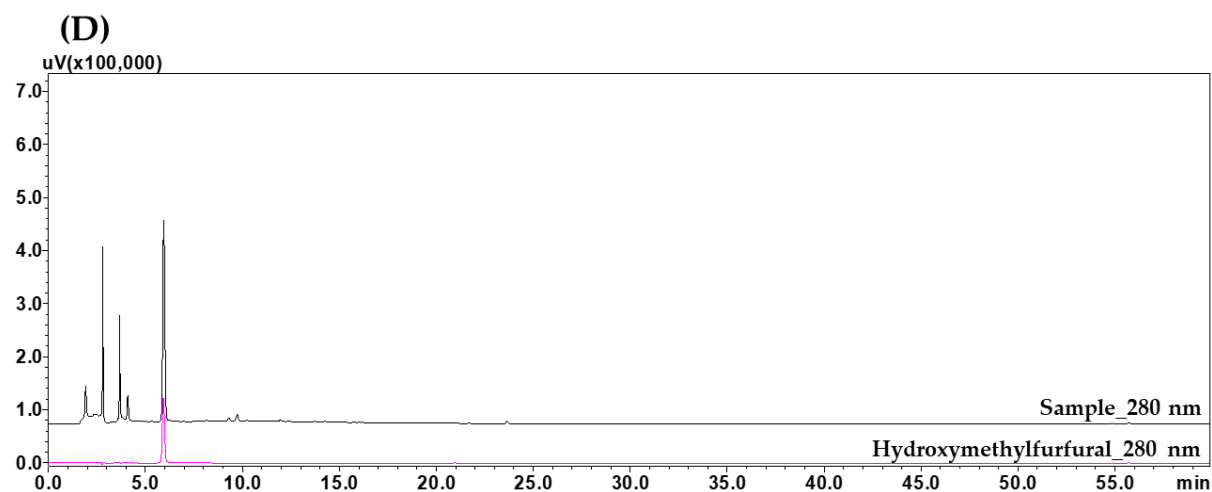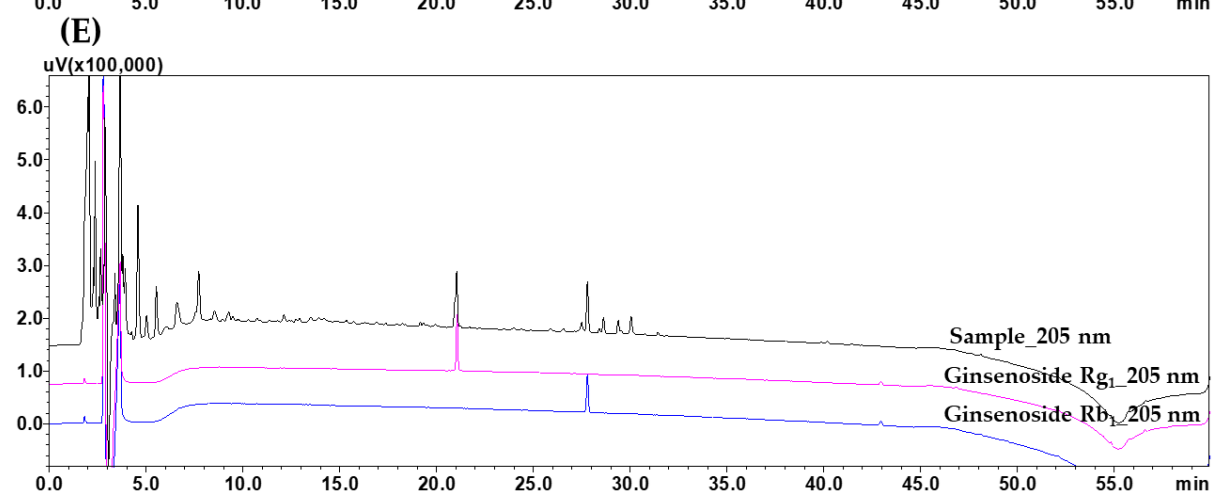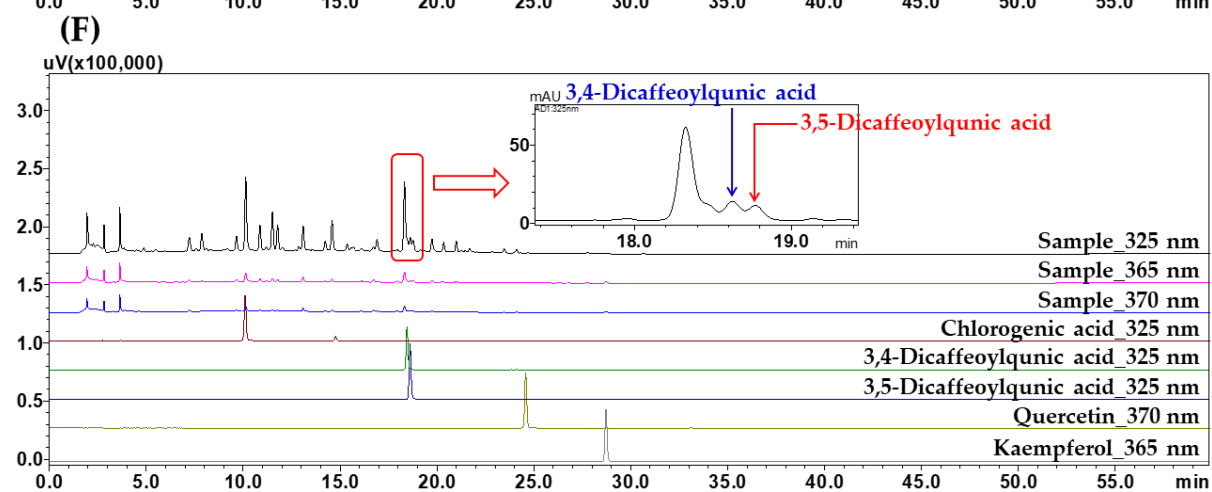



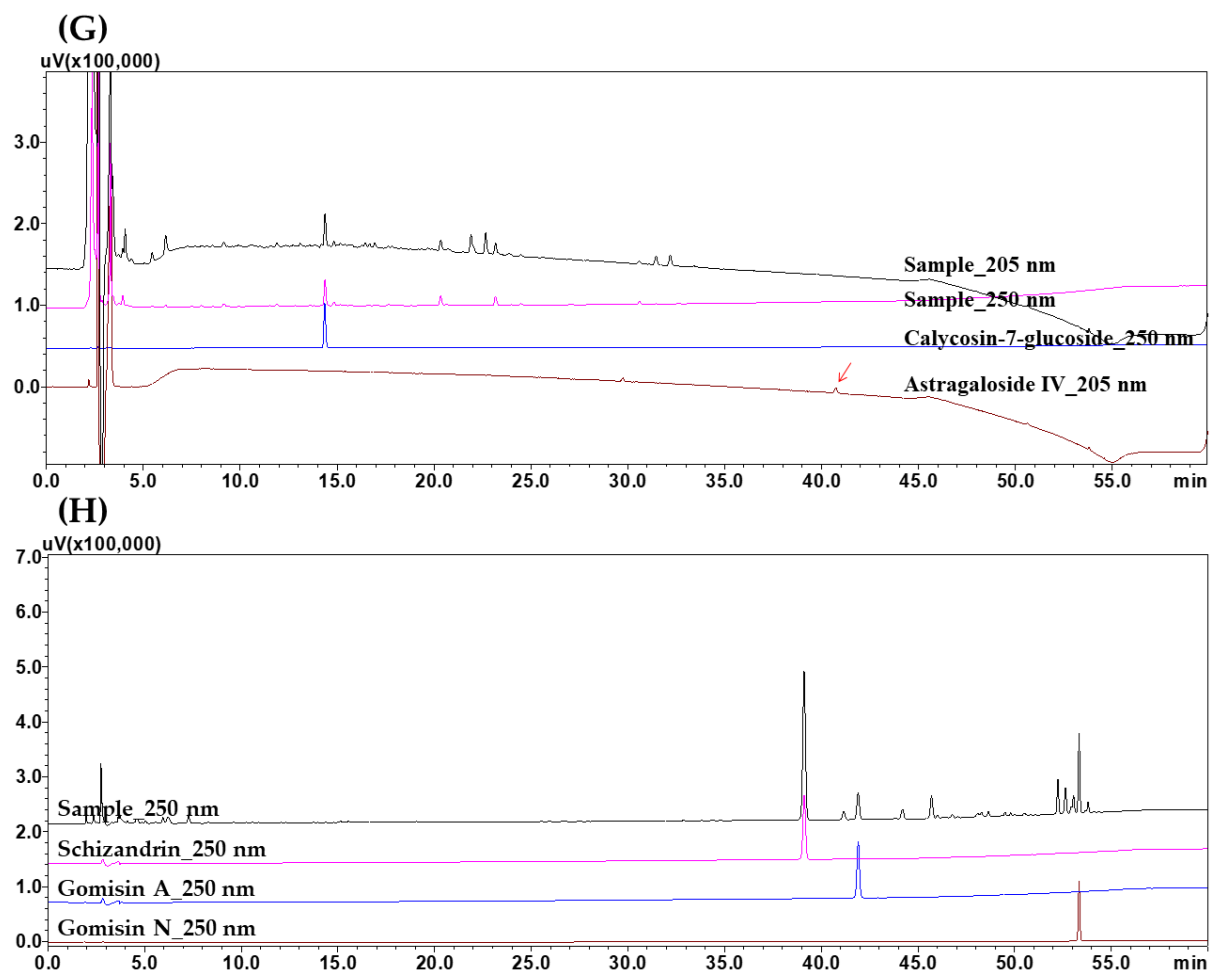

**Figure S1.** HPLC–PDA chromatograms considered for the selection of target components. A; Mixed 17 standard compounds. B; 70% methanol solution of lyophilized BPT water extract. C; *M. alba* extract. D; *R. glutinosa* extract. E; *P. ginseng* extract. F; *A. tataricus* extract. G; *A. propinquus* extract. H; *S. chinensis* extract. Hydroxymethylfurfural (1), mulberroside A (2), chlorogenic acid (3), rutin (4), calycosin-7-*O*-glucoside (5), isoquercetin (6), 3,4-dicaffeoylquinic acid (7), 3,5-dicaffeoylquinic acid (8), ginsenoside Rg<sub>1</sub> (9), resveratrol (10), quercetin (11), ginsenoside Rb<sub>1</sub> (12), kaempferol (13), schizandrin (14), gomisin A (15), astragaloside IV (16), and gomisin N (17).

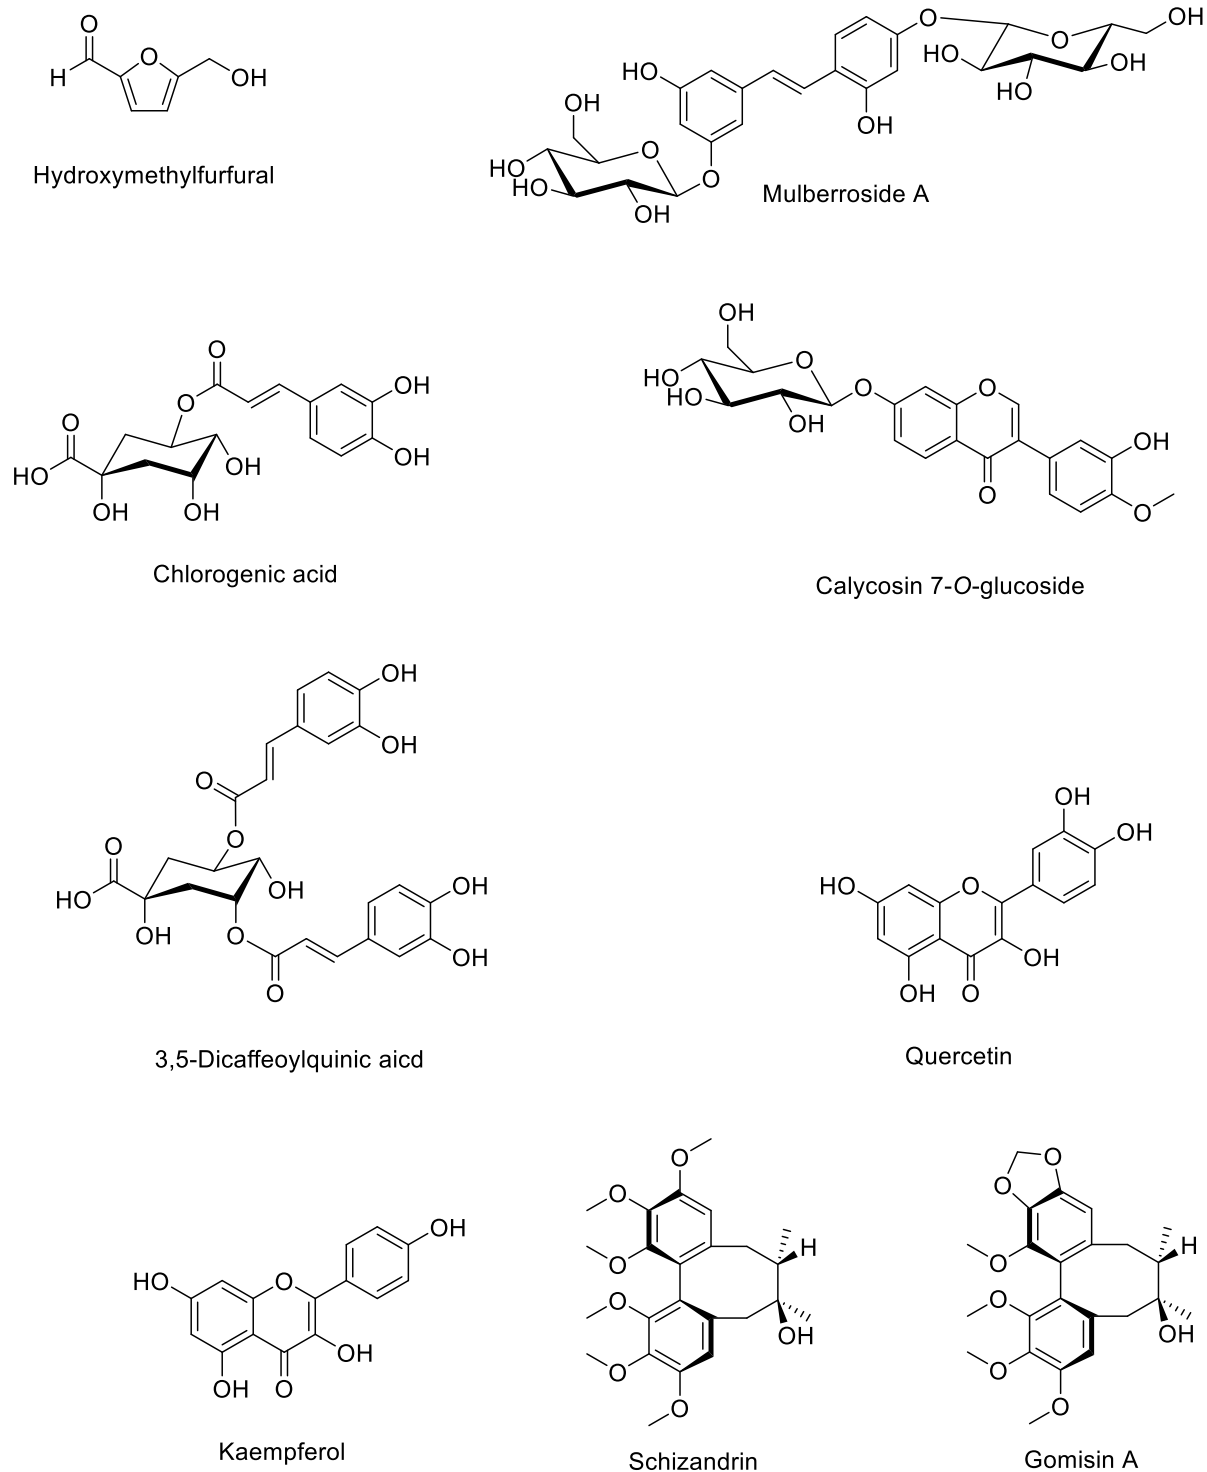

**Figure S2.** Chemical structures of the nine target components selected for simultaneous analysis in BPT.

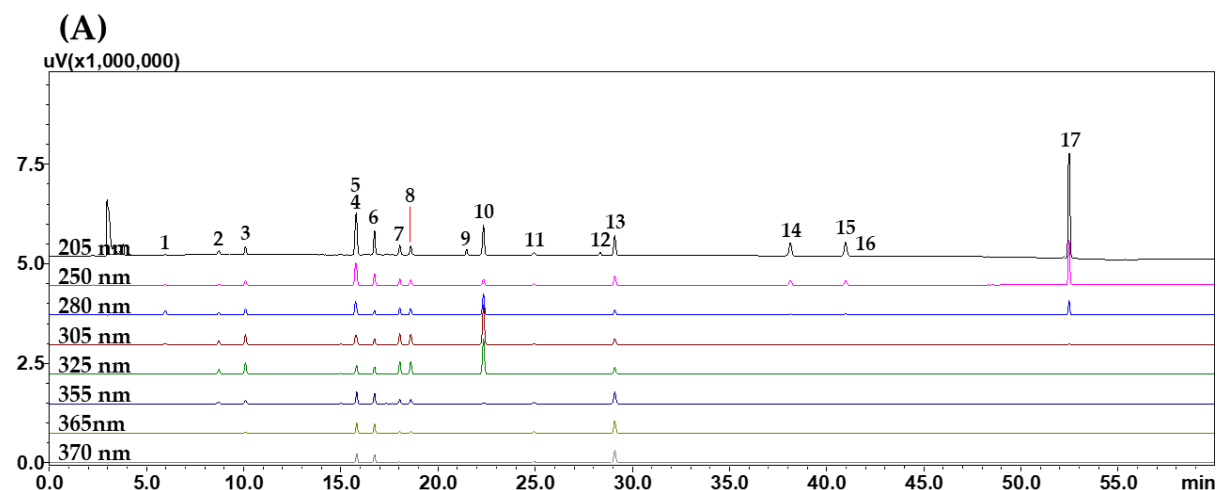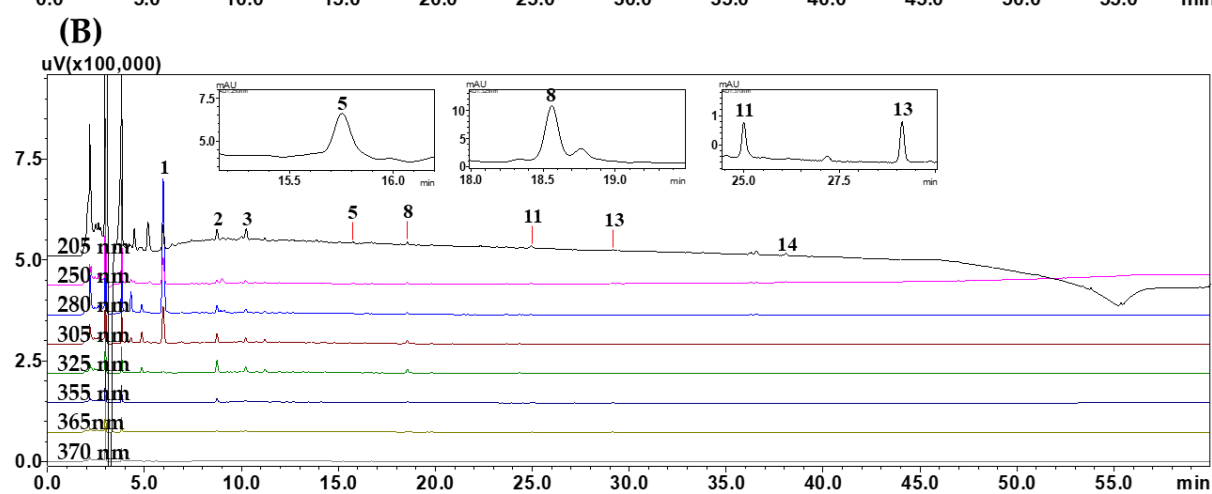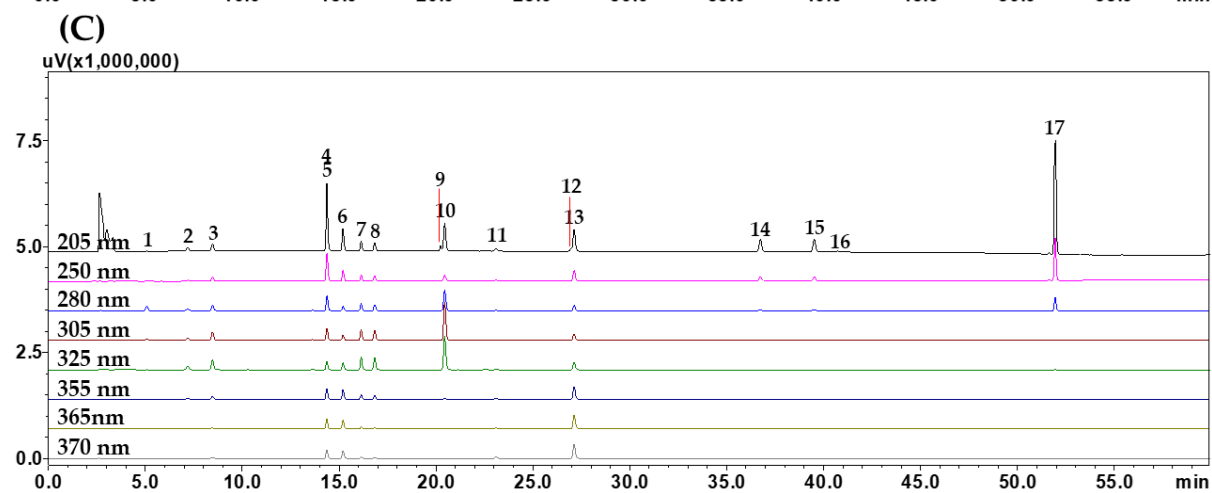

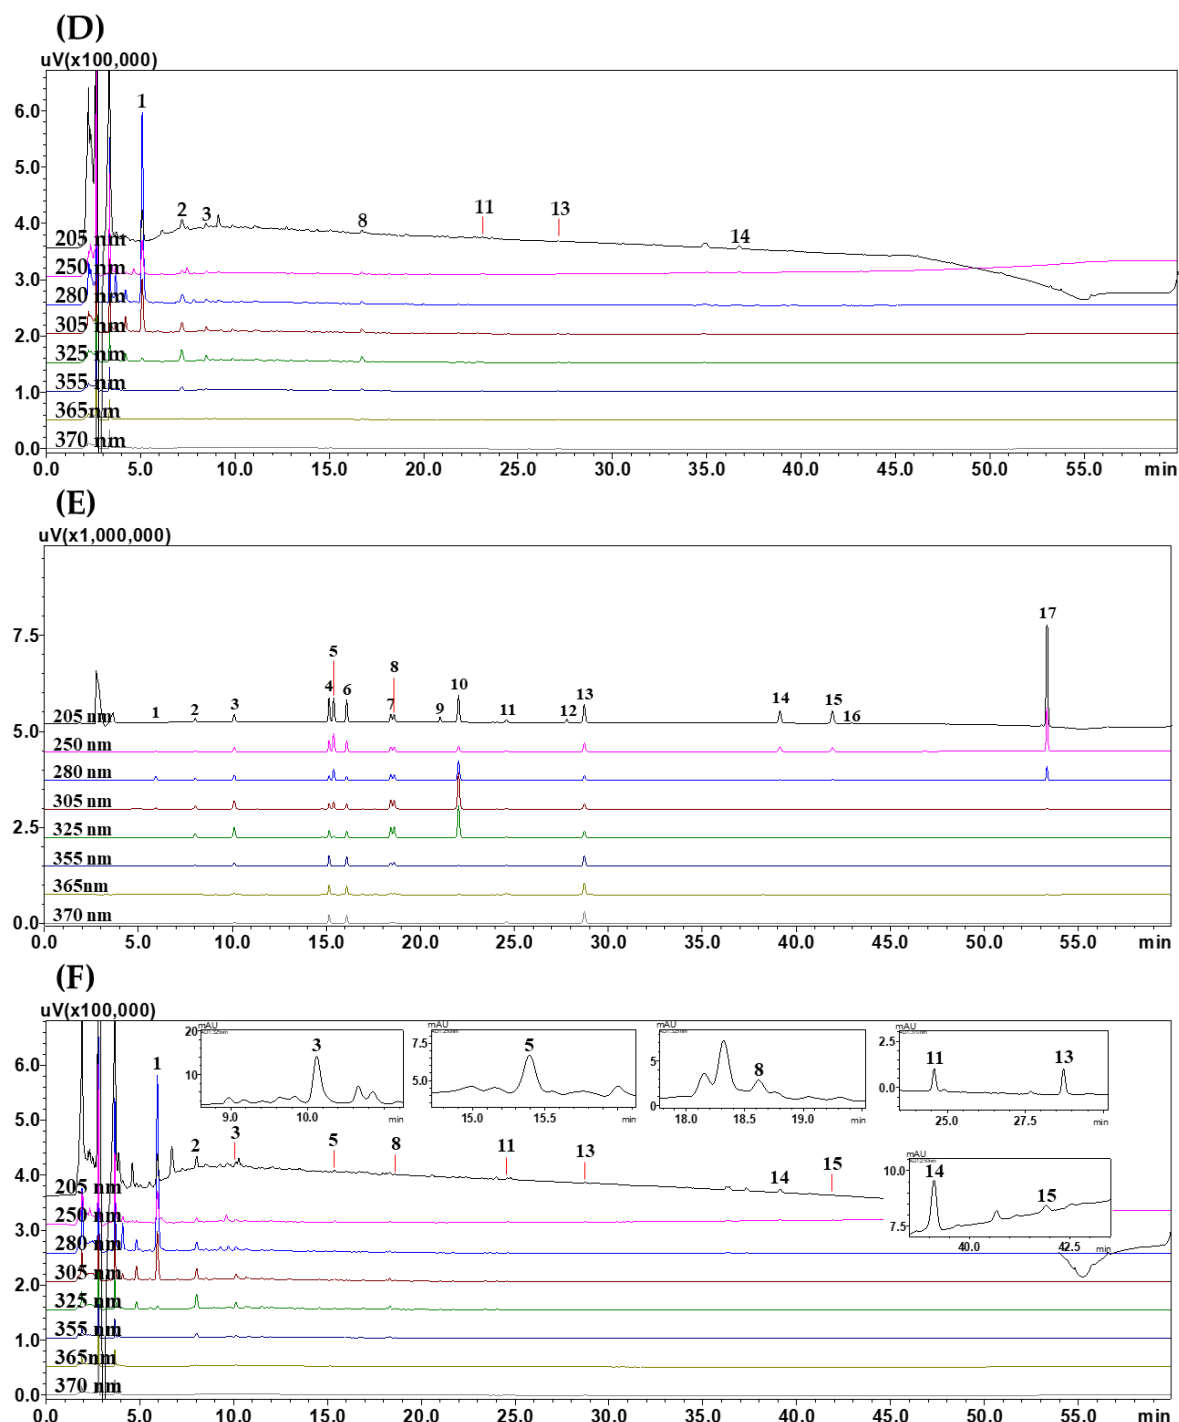

**Figure S3.** Comparison of HPLC–PDA chromatograms according to column manufacturer. Standard mixture (A) and BPT sample (B) using Gemini C<sub>18</sub> column (Phenomenex, Torrance, CA, USA), standard mixture (C) and BPT sample (D) using Capcell Pak UG80 C<sub>18</sub> column (Shiseido, Tokyo, Japan), and standard mixture (E) and BPT sample (F) using SunFire™ C<sub>18</sub> column (Waters, Milford, MA, USA). Hydroxymethylfurfural (1), mulberroside A (2), chlorogenic acid (3), rutin (4), calycosin-7-*O*-glucoside (5), isoquercetin (6), 3,4-dicaffeoylquinic acid (7), 3,5-dicaffeoylquinic acid (8), ginsenoside Rg<sub>1</sub> (9), resveratrol (10), quercetin (11), ginsenoside Rb<sub>1</sub> (12), kaempferol (13), schizandrin (14), gomisin A (15), astragaloside IV (16), and gomisin N (17).

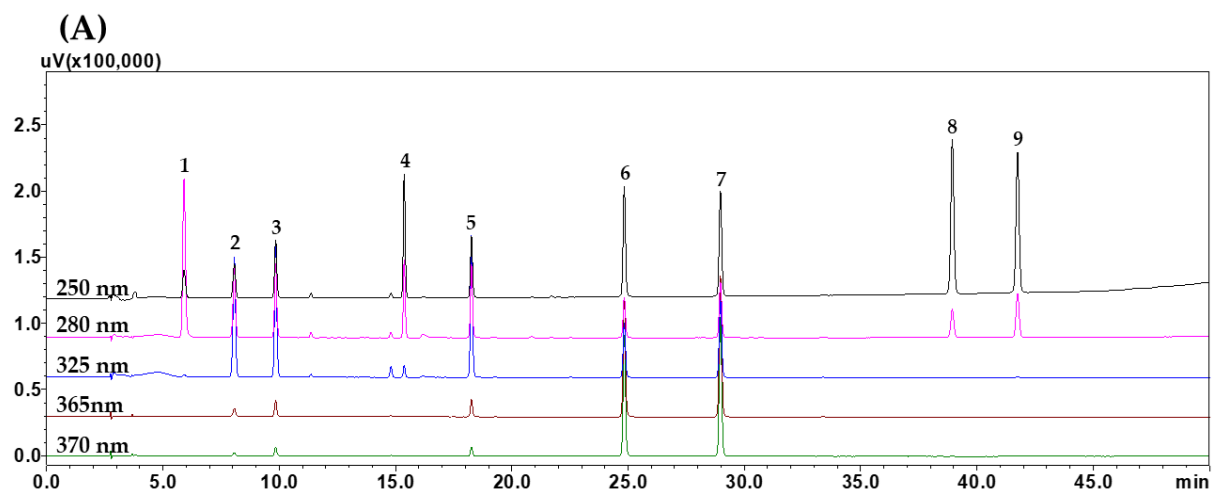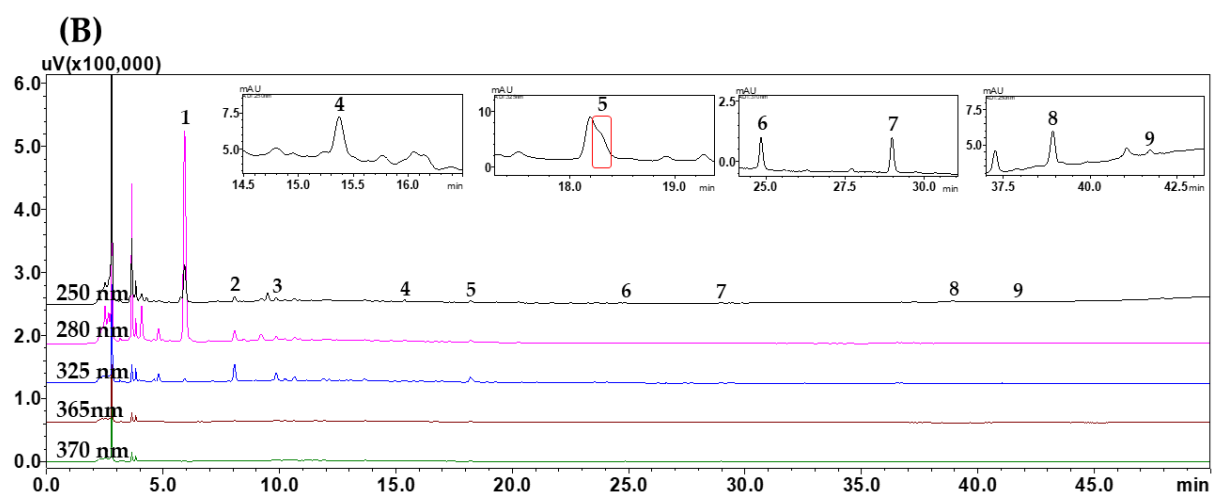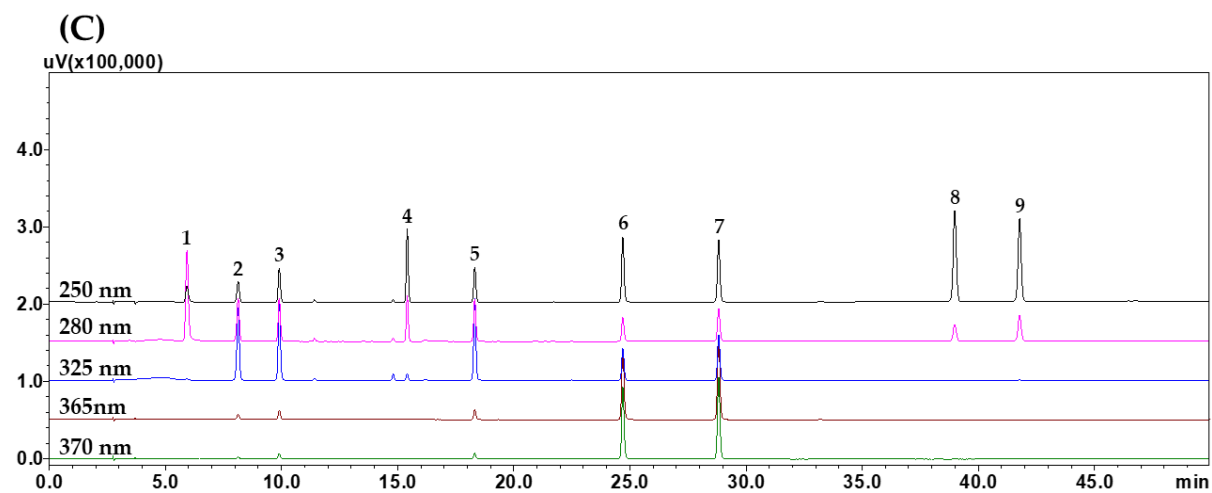

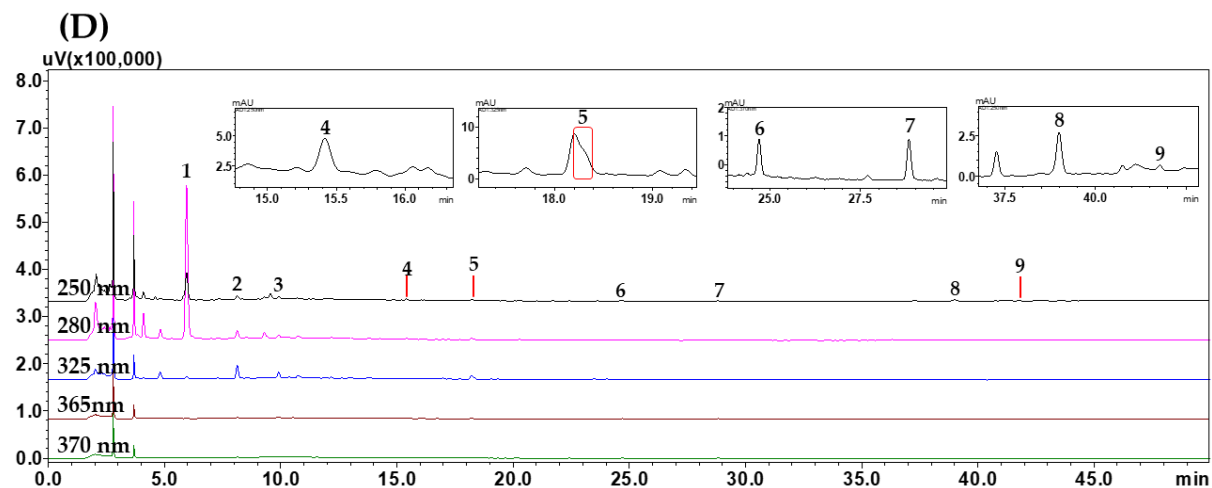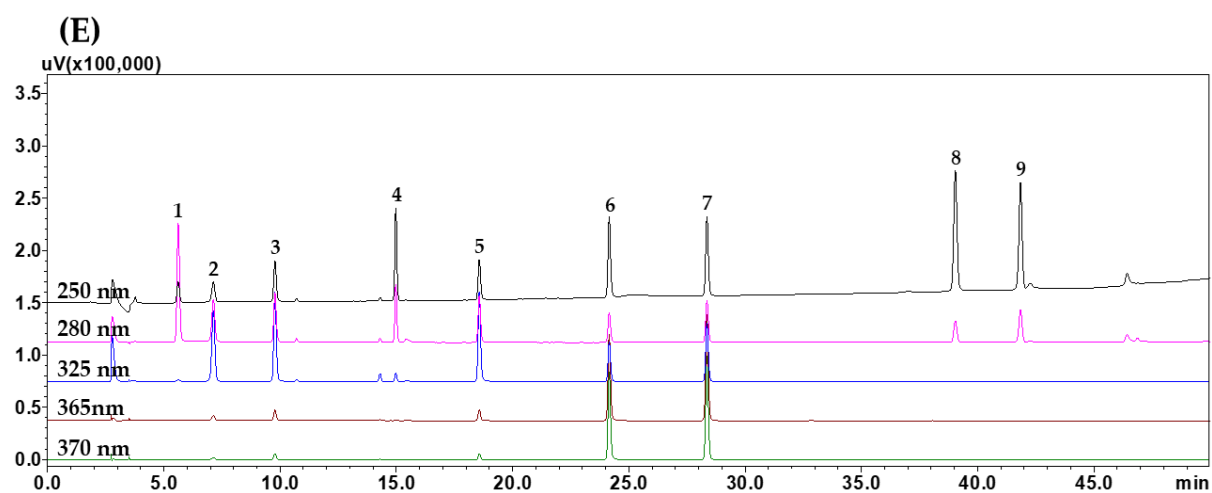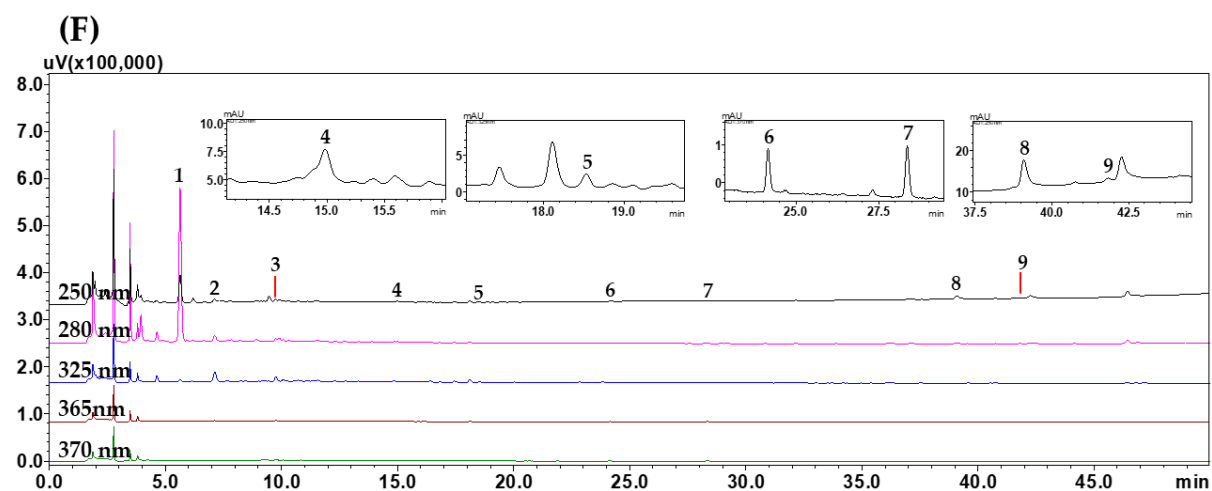

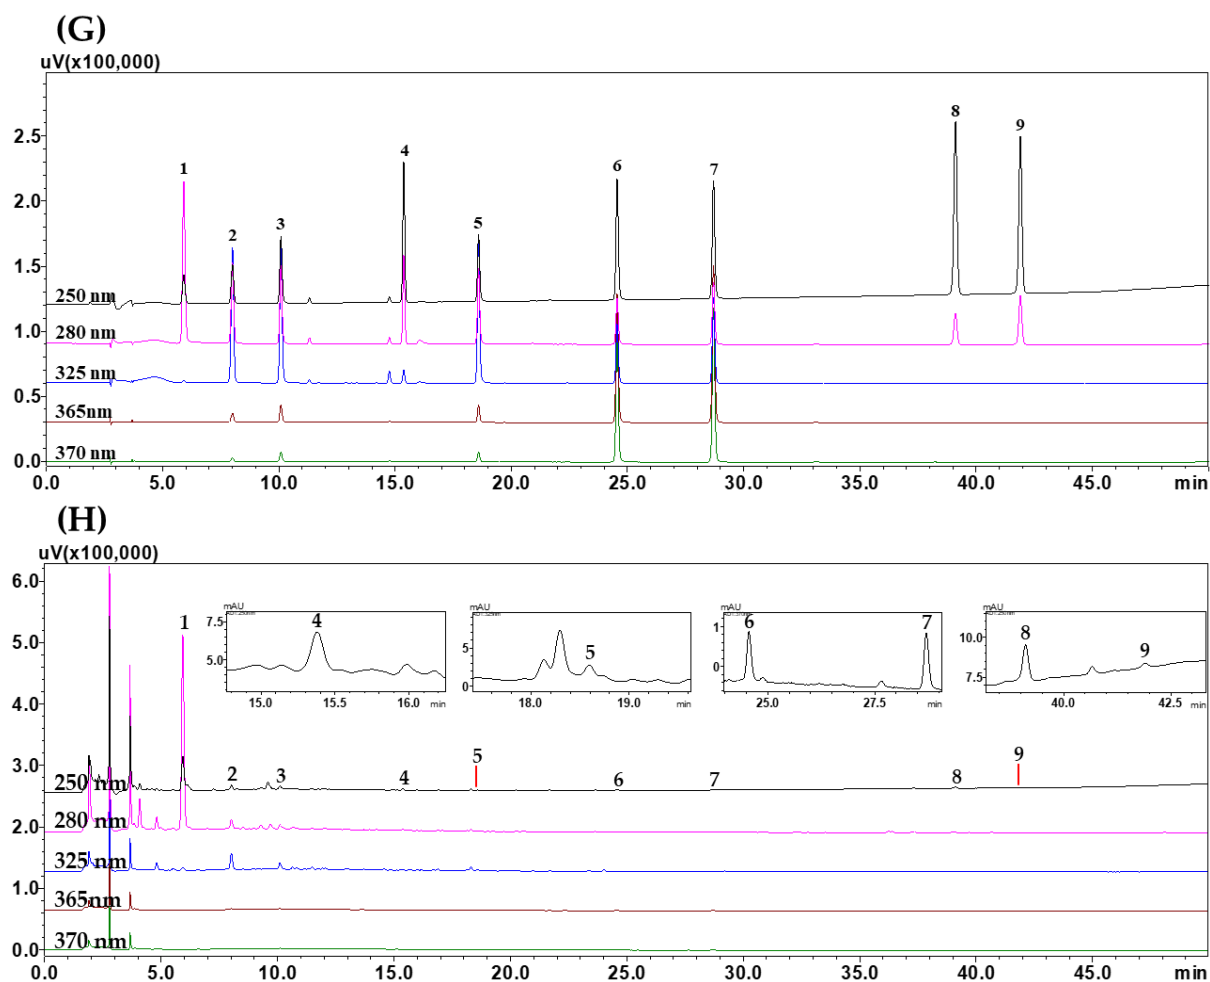

**Figure S4.** Comparison of HPLC–PDA chromatograms according to the type of acid for the nine selected target compounds. Standard mixture (A) and BPT sample (B) using 0.1% (v/v) trifluoroacetic acid, standard mixture (C) and BPT sample (D) using 0.1% (v/v) phosphoric acid, standard mixture (E) and BPT sample (F) using 1.0% (v/v) acetic acid, and standard mixture (G) and BPT sample (H) using 0.1% (v/v) formic acid. Hydroxymethylfurfural (1), mulberroside A (2), chlorogenic acid (3), calycosin-7-*O*-glucoside (4), 3,5-dicaffeoylquinic acid (5), quercetin (6), kaempferol (7), schizandrin (8), and gomisin A (9).

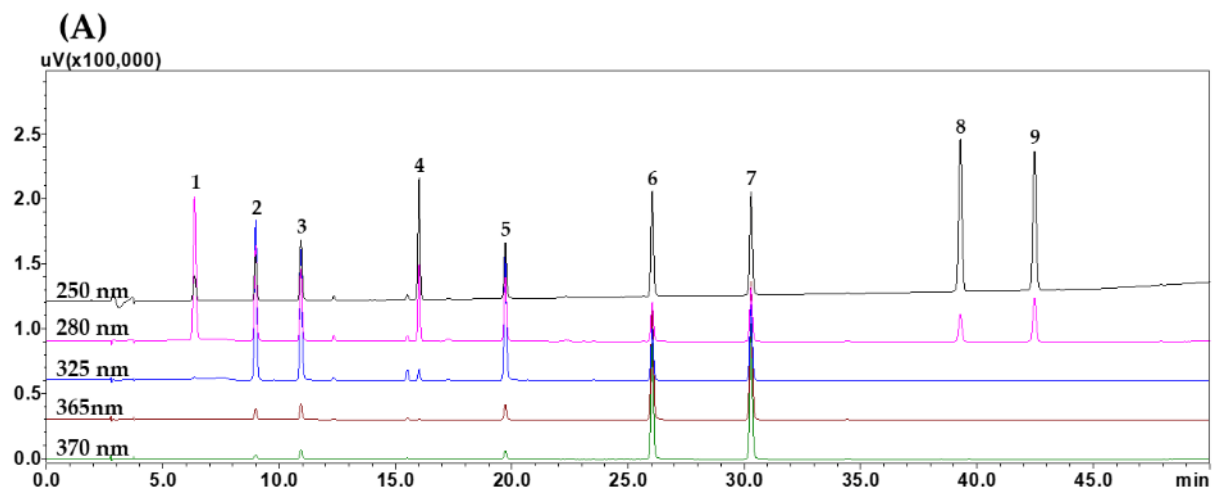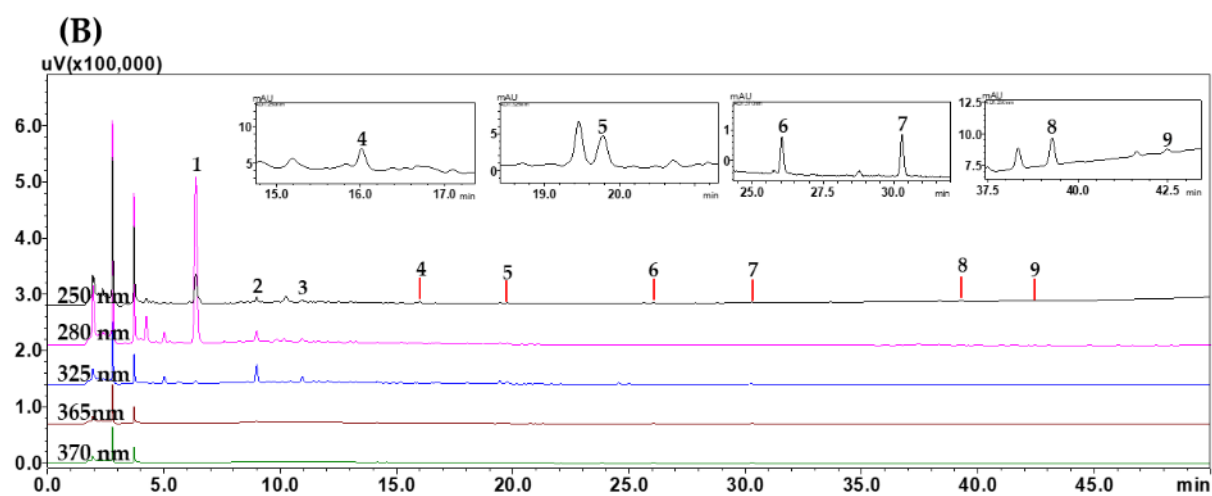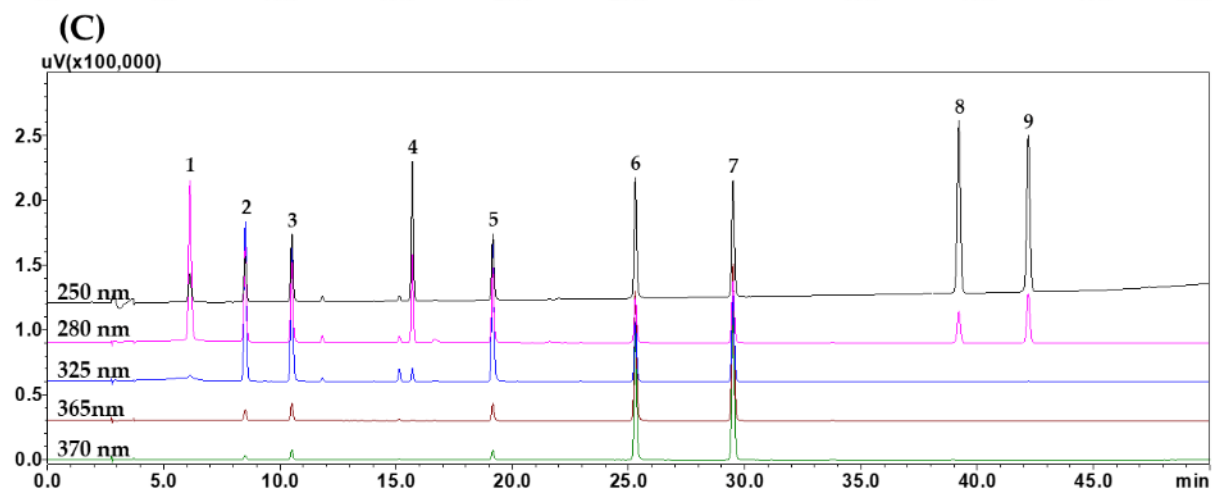



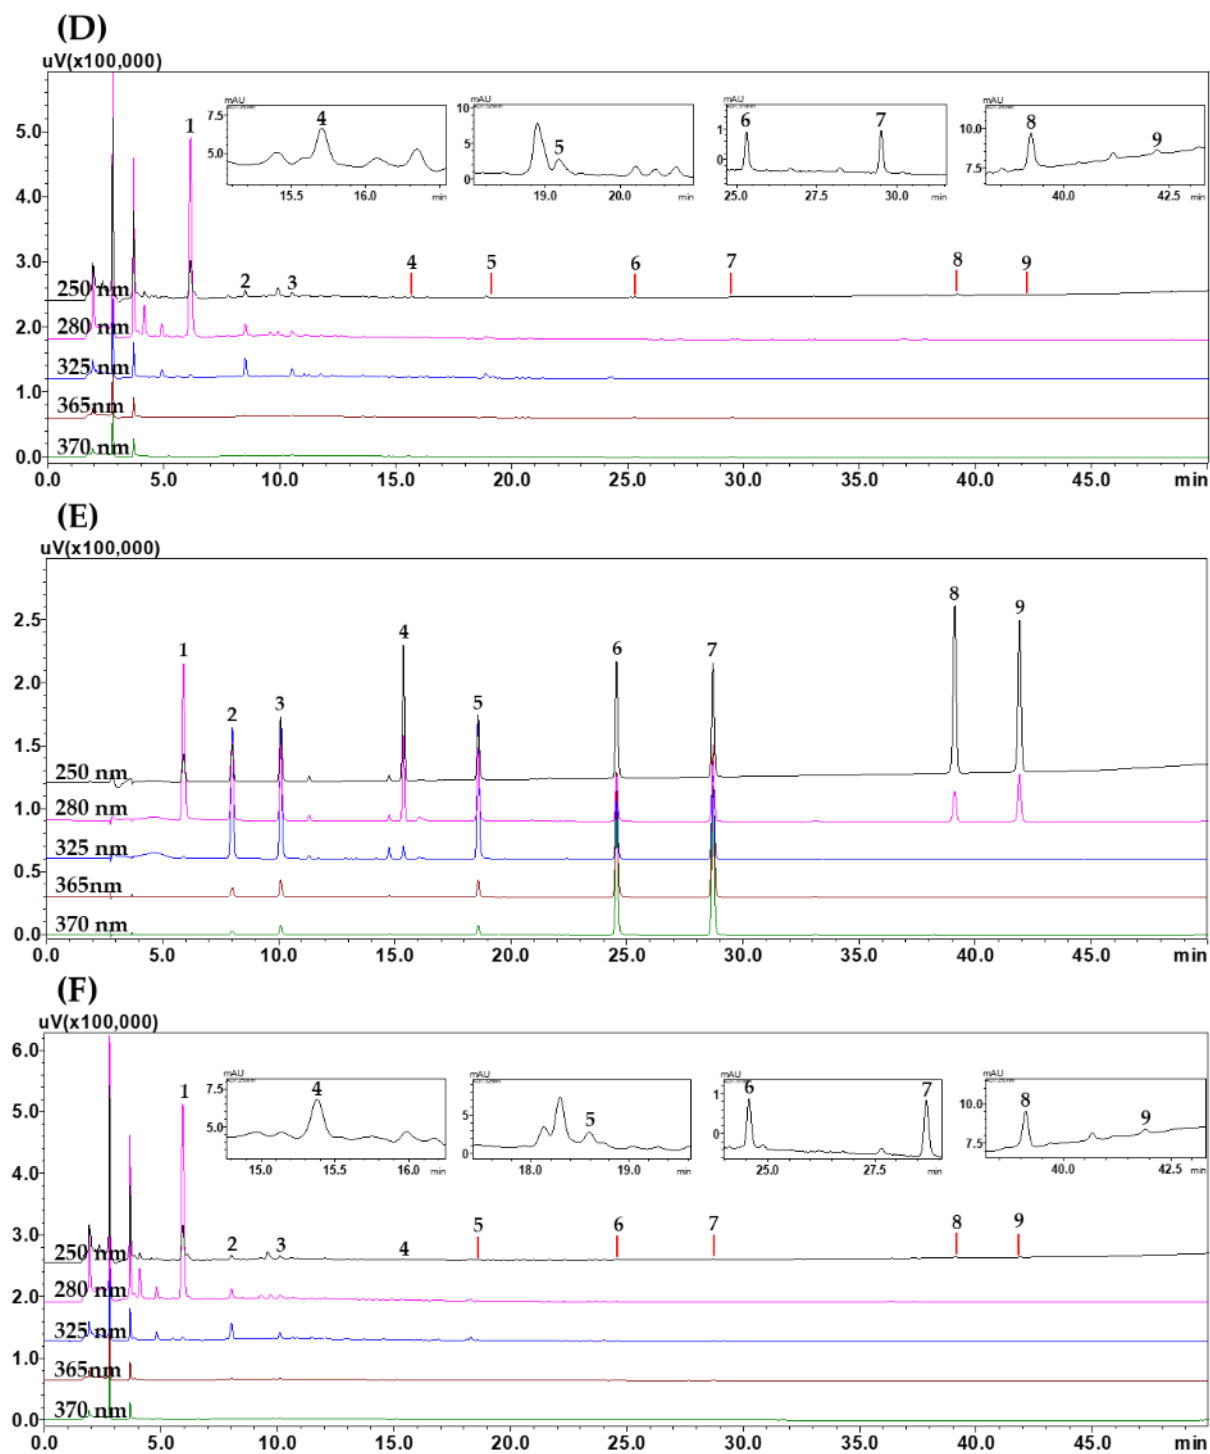

**Figure S5.** Comparison of HPLC–PDA chromatograms according to column temperatures of the nine selected target compounds. Standard mixture (A) and BPT sample (B) at 30 °C, standard mixture (C) and BPT sample (D) at 35 °C, and standard mixture (E) and BPT sample (F) at 40 °C. Hydroxymethylfurfural (1), mulberroside A (2), chlorogenic acid (3), calycosin-7-*O*-glucoside (4), 3,5-dicaffeoylquinic acid (5), quercetin (6), kaempferol (7), schizandrin (8), and gomisins A (9).

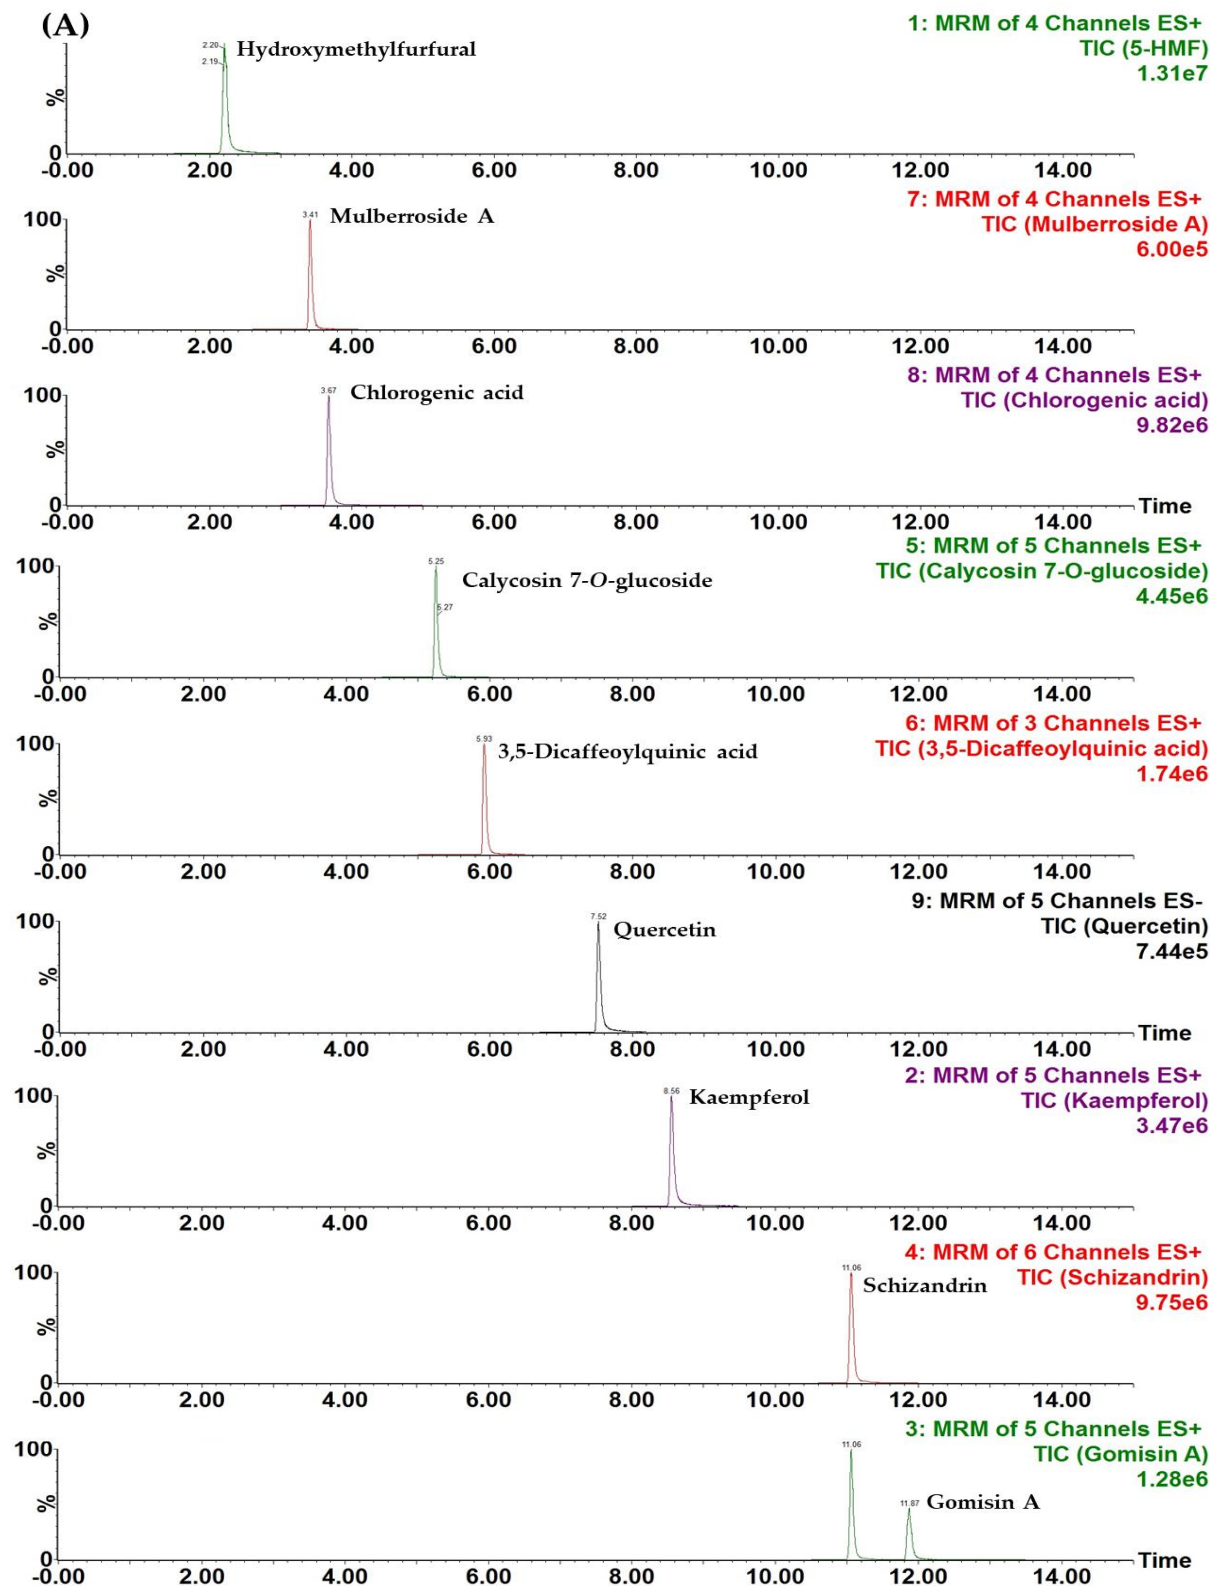

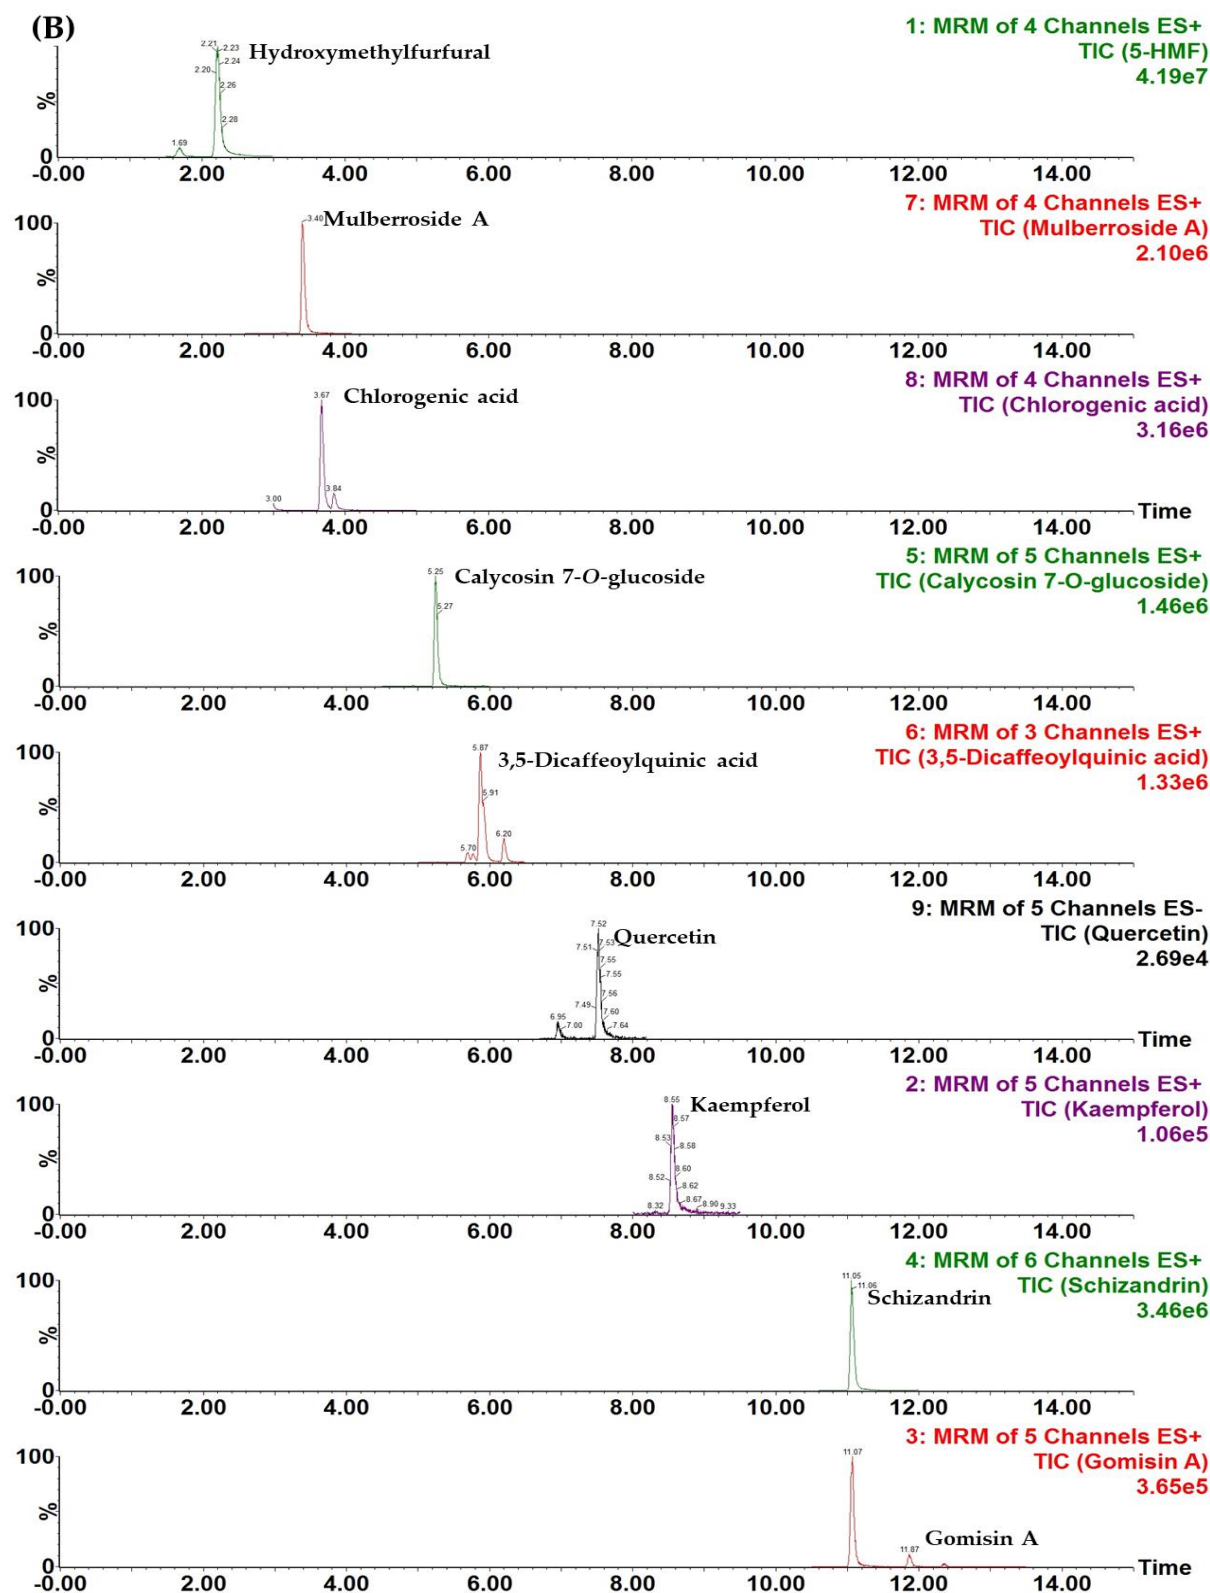

**Figure S6.** Extracted ion chromatograms of standard compounds (A) and BPT sample (B) by UPLC-MS/MS MRM method. Hydroxymethylfurfural (1), mulberroside A (2), chlorogenic acid (3), calycosin-7-O-glucoside (4), 3,5-dicaffeoylquinic acid (5), quercetin (6), kaempferol (7), schizandrin (8), and gomisin A (9).

**(A)-Precursor ion peak**

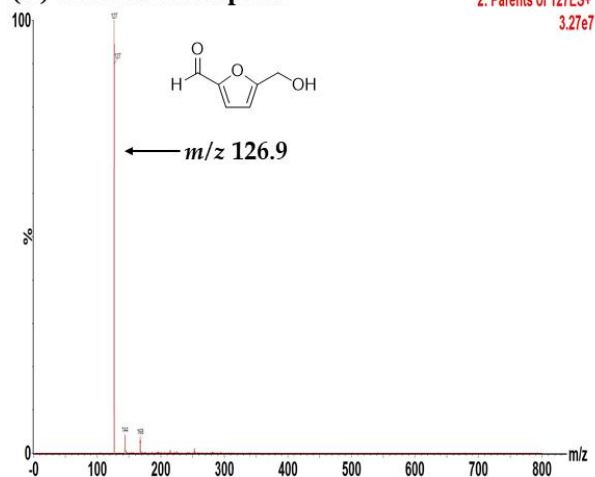

**(A)-Product ion peak**

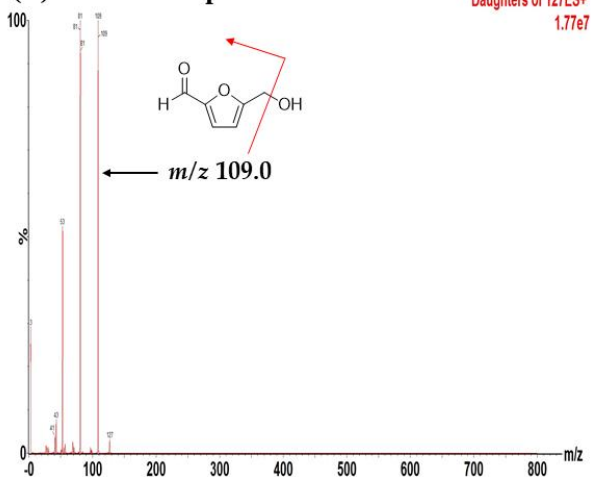

**(B)-Precursor ion peak**

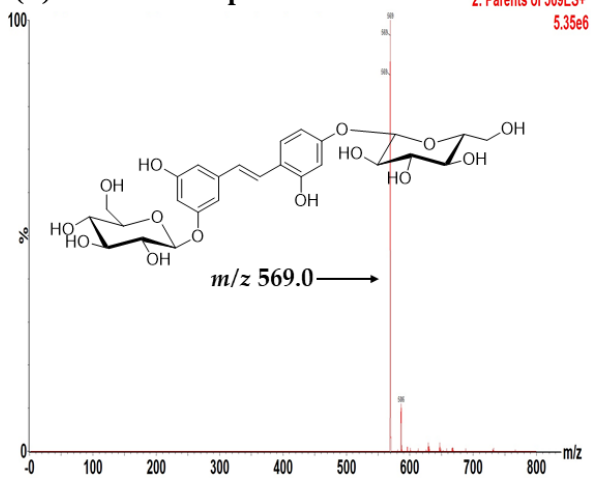

**(B)-Product ion peak**

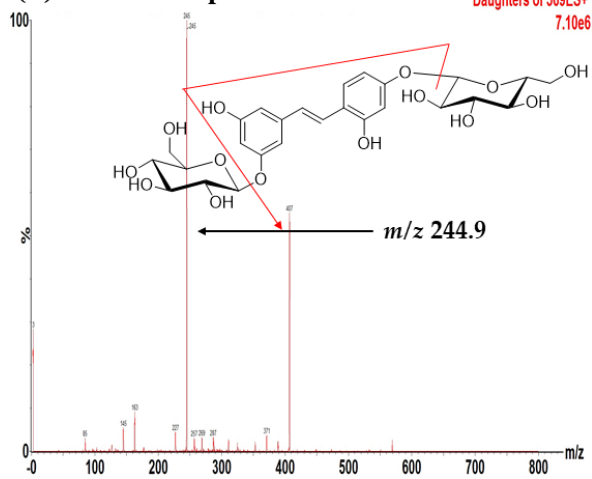

**(C)-Precursor ion peak**

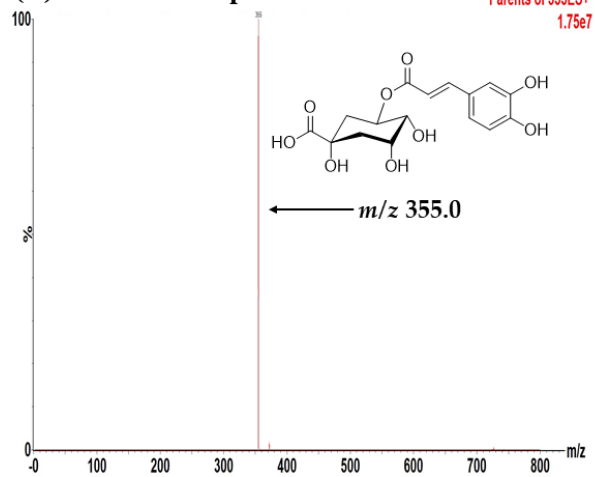

**(C)-Product ion peak**

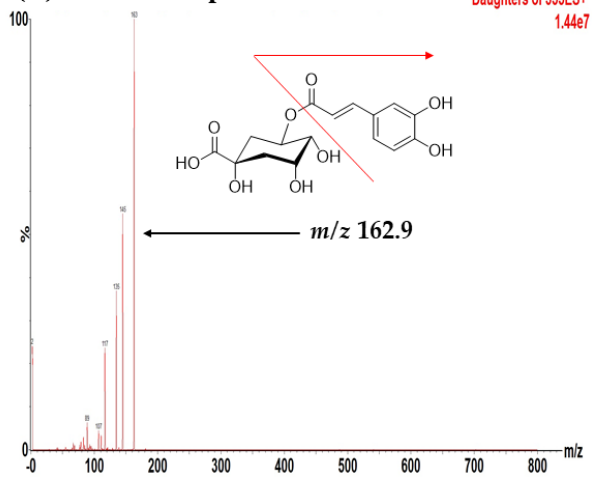

**(D)-Precursor ion peak**

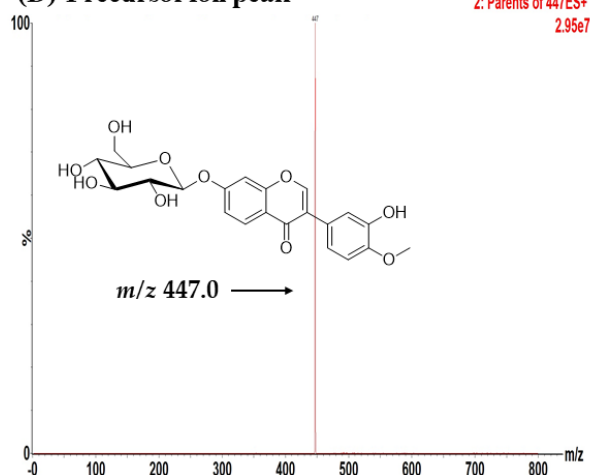

**(D)-Product ion peak**

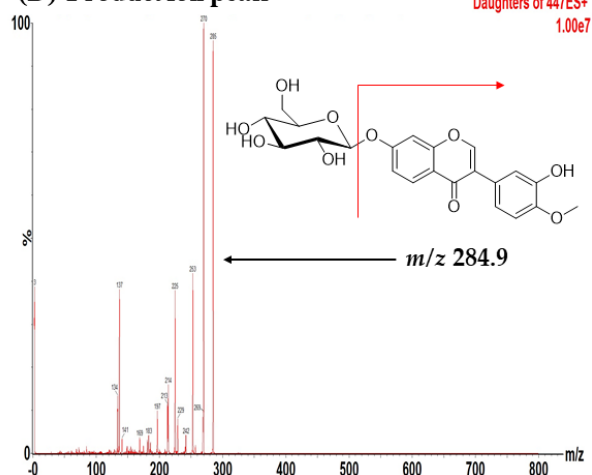

**(E)-Precursor ion peak**

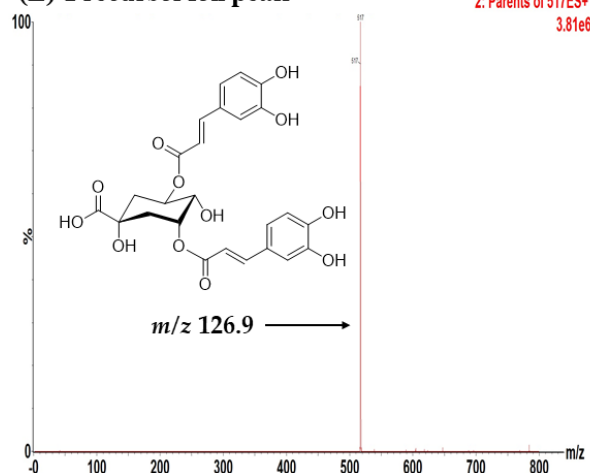

**(E)-Product ion peak**

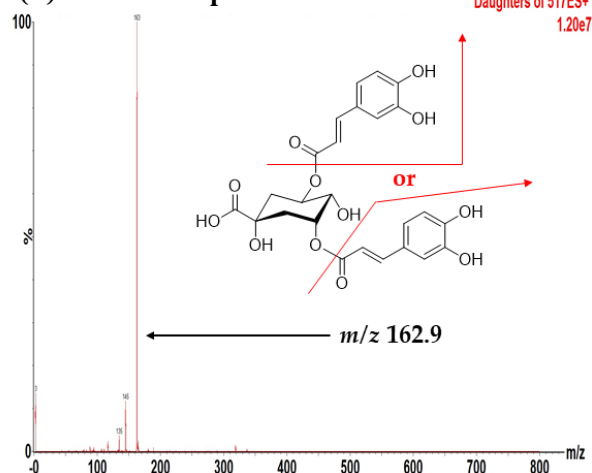

**(F)-Precursor ion peak**

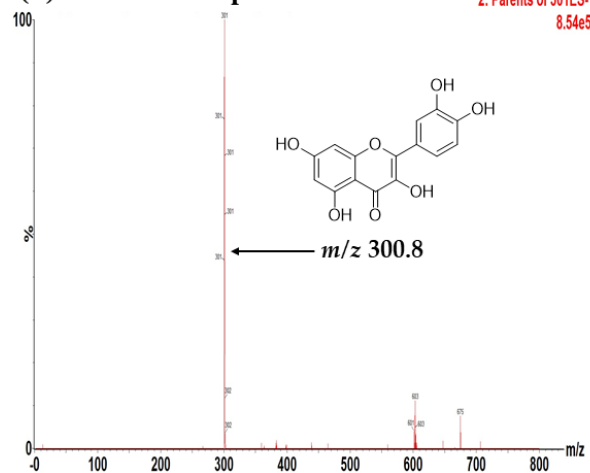

**(F)-Product ion peak**

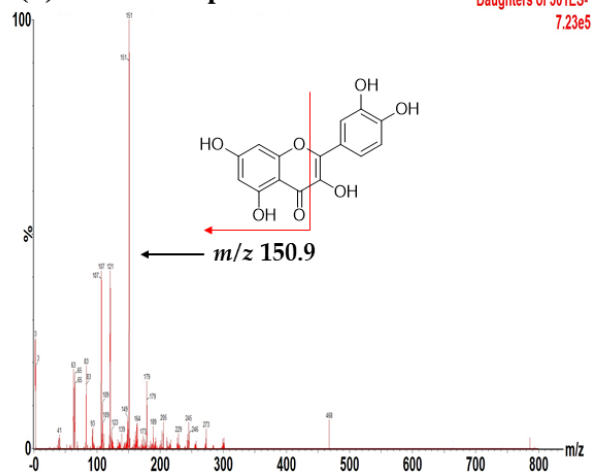

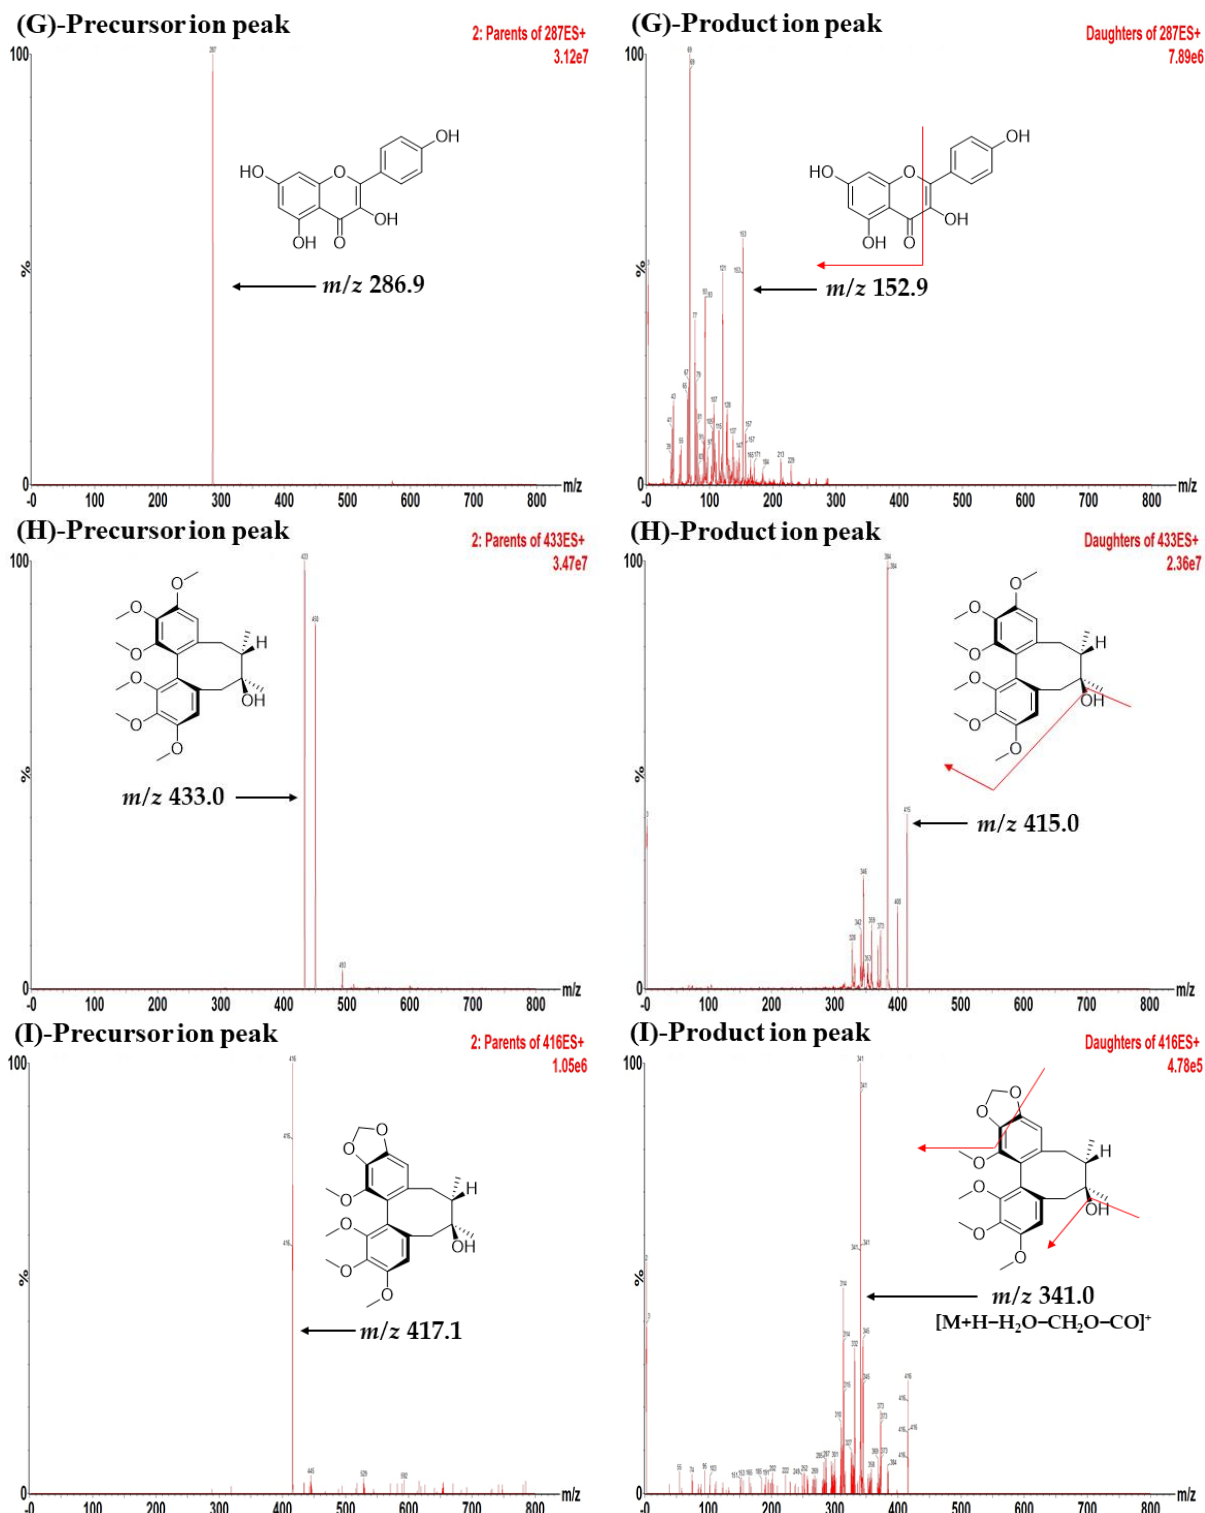

**Figure S7.** Precursor ion (Q1) and product ion (Q3) peaks for each target compound. Hydroxymethylfurfural (A), mulberroside A (B), chlorogenic acid (C), calycosin-7-O-glucoside (D), 3,5-dicaffeoylquinic acid (E), quercetin (F), kaempferol (G), schizandrin (H), and gomisin A (I).
